# Supplementary material for: Impact of variceal eradication on rebleeding and prognosis in cirrhotic patients undergoing secondary prophylaxis
Source: PubMed Central journal article supplement — Ann Transl Med. 2021 Apr;9(7):540. doi: 10.21037/atm-20-3401 (PMC8105824; doi:10.21037/atm-20-3401), 2021-04
Supplement: atm-09-07-540-supplementary.pdf [file atm-09-07-540-supplementary.pdf]

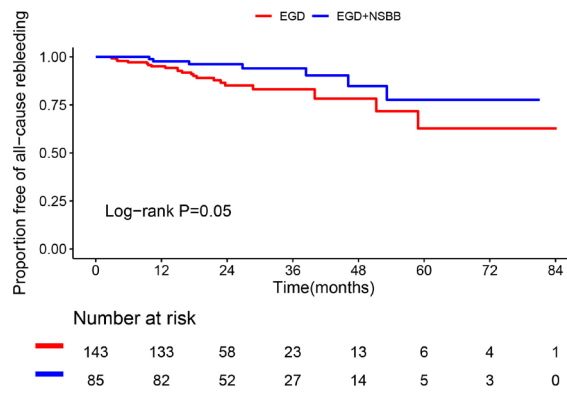

**Figure 1** Survival curves of patients showed that the cumulative incidence of all-cause rebleeding was non-significant higher in Endoscopy monotherapy group than in Endoscopy + NSBB group. EGD, esophagogastroduodenoscopy; NSBB, non-selective beta-blocker.

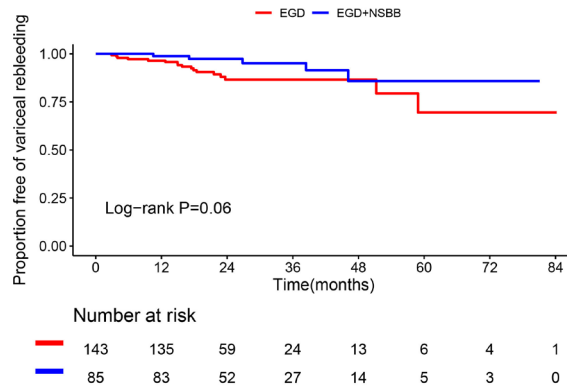

**Figure 2** Survival curves of patients showed that the cumulative incidence of variceal rebleeding was non-significant higher in Endoscopy monotherapy group than in Endoscopy + NSBB group. EGD, esophagogastroduodenoscopy; NSBB, non-selective beta-blocker.

**Table S1** Summary of endoscopic sequential therapy

| Characteristics                                  | Total cohort (n=228) |
|--------------------------------------------------|----------------------|
| Endoscopic treatment option, n (%)               |                      |
| EBL                                              | 223 (97.8)           |
| ECl                                              | 91 (39.9)            |
| EIS                                              | 38 (16.7)            |
| Mean time used for variceal eradication (months) | 8.5±9.5              |
| Mean interval between sessions (months)          | 2.1±2.0              |
| Sessions of endoscopic therapies (mean, range)   | 3.6±1.8 [1–8]        |
| Sessions of EBL (mean, range)                    | 3.0±1.5 (0–7)        |
| Total number of bands (mean, range)              | 18±8.8 (0–43)        |
| Sessions of ECl (mean, range)                    | 0.5±0.7 (0–4)        |
| Sessions of EIS (mean, range)                    | 0.3±0.8 (0–6.0)      |

Data presented as mean ± SD, range or number of patients (percentage) where appropriate. EBL, Endoscopic banding ligation; ECl, endoscopic cyanoacrylate injection; EIS, endoscopic injection sclerotherapy.

**Table S2** Comparison of baseline parameters between fast-VE group and slow-VE group

| Parameters                       | Fast-VE group (n=128) | Slow-VE group (n=100) | P value |
|----------------------------------|-----------------------|-----------------------|---------|
| Age (year)                       | 50.4±10.5             | 49.2±10.6             | 0.402   |
| PLT ( $\times 10^9/L$ )          | 88.7±46.0             | 85.0±39.6             | 0.522   |
| ALT (U/L)                        | 40.9±53.0             | 37.6±24.1             | 0.569   |
| ALB (g/L)                        | 34.4±5.3              | 34.4±5.5              | 0.988   |
| TBIL ( $\mu\text{mol/L}$ )       | 27.9±32.4             | 23.9±18.6             | 0.266   |
| MELD score                       | 11.5±4.3              | 10.9±3.2              | 0.278   |
| Child-Pugh classification, n (%) |                       |                       | 0.868   |
| A                                | 74 (57.8)             | 59 (59.0)             | –       |
| B                                | 44 (34.4)             | 35 (35.0)             | –       |
| C                                | 10 (7.8)              | 6 (6.0)               | –       |
| Beta-blockers non-users          | 84 (65.6)             | 59 (59.0)             | 0.305   |

Data presented as mean ± SD or number of patients (percentage) where appropriate. VE, variceal eradication; PLT, platelet; ALT, alanine transaminase; ALB, albumin; TBIL, total bilirubin; MELD, model for end-stage liver disease.
